# Supplementary material for: Development of a risk prediction model for postpartum stress urinary incontinence: a multicenter retrospective longitudinal study in Indonesia
Source: PeerJ. 2025 May 30;13:e19308. doi: 10.7717/peerj.19308 (PMC12129005; doi:10.7717/peerj.19308)
Supplement: Supplemental Information 1 [file peerj-13-19308-s001.xlsx]

## Sheet: Post Partum
UI after delivery (Yes/No)	If YES, when (week after delivery)	UI during pregnancy (Yes/No)	If YES, when (months)	Kegel (Yes/No)	Duration Exercise (> 1mo, < 1 mo)	frequency (1x/week, >1x/week)	Control after 42 days	Constipation	Job	Education level	Weeks after delivery	Height (cm)	weight (during pregnancy) kg	weight before pregnancy (kg)	Pregnancy	Abortion (0,1,2)	Abortion by (natural, induction, drug)	Previous labor (first pregnancy/ SC/ normal)	Current delivery (normal/ SC)	Epis / Oxyt (Induction)	fetal weight (gram)		height (M)	height square	BMI (during pregnancy	BMI before pregnancy
Yes	6	Yes	6	Yes	<1mo	>1x/week	Yes	Yes	Private employee	Senior High School	6	150	65	50	2	0		Normal	Normal		2900		1.5	2.25	28.8889	22.2222
No		Yes	5	No			Yes	No	Housewife	Elementary school	1	145	50	40	4	0		Normal	Normal		2900		1.45	2.1025	23.7812	19.025
No		Yes	7	No			Yes	No	Housewife	Elementary school	2	158	61	52	3	1	Natural	Normal	Normal		2800		1.58	2.4964	24.4352	20.83
No		No	0	No			Yes	No	Self-employee	Junior high School	2	155	64	53	4	0		Normal	SC		3300		1.55	2.4025	26.6389	22.0604
No		No	0	No			Yes	Yes	Housewife	Elementary school	3	155	50	41	1	0		First	Normal	Epis	2600		1.55	2.4025	20.8117	17.0656
No		No	0	No			Yes	No	Housewife	Elementary school	2	146	48	40	2	0		Normal	Normal		3100		1.46	2.1316	22.5183	18.7652
No		No	0	No			Yes	No	Housewife	Elementary school	2	150	63	56	2	0		Normal	Normal		3100		1.5	2.25	28	24.8889
No		Yes	6	No			Yes	Yes	Private employee	Senior High School	2	152	58	50	2	0		Normal	Normal		2900		1.52	2.3104	25.1039	21.6413
Yes	4	No	0	No			No	Yes	Housewife	Junior high School	4	155	53	44	1	0		First	Normal	Epis	2500		1.55	2.4025	22.0604	18.3143
Yes	3	No	0	No			Yes	No	Housewife	Elementary school	3	160	65	56	3	0		Normal	Normal		3200		1.6	2.56	25.3906	21.875
No		Yes	7	No			Yes	No	Housewife	Elementary school	2	159	68	61	1	0		First	Normal		2500		1.59	2.5281	26.8977	24.1288
No		No	0	No			Yes	No	Self-employee	Senior High School	2	155	52	43	2	0		Normal	Normal	Epis	2900		1.55	2.4025	21.6441	17.898
No		No	0	No			Yes	No	Housewife	Senior High School	2	156	59	49	3	0		Normal	Normal		3400		1.56	2.4336	24.2439	20.1348
No		Yes	3	Yes	>1 mo	>1x/week	Yes	Yes	Private employee	Senior High School	2	158	60	50	2	0		Normal	Normal		3500		1.58	2.4964	24.0346	20.0288
Yes	2	No	0	No			No	Yes	Housewife	No school	2	149	54	45	4	0		Normal	Normal		3300		1.49	2.2201	24.3232	20.2694
No		No	0	Yes	>1 mo	>1x/week	Yes	No	Private employee	Senior High School	2	150	62	50	2	0		Normal	normal		2900		1.5	2.25	27.5556	22.2222
No		No	0	No			Yes	No	Private employee	Vocational school	2	148	42	43	1	0		First	Normal		2700		1.48	2.1904	19.1746	19.6311
No		No	0	No			Yes	No	Self-employee	Elementary school	2	153	59	50	5	0		Normal	Normal		2900		1.53	2.3409	25.204	21.3593
Yes	4	No	0	No			Yes	No	Housewife	Junior high school	4	155	57	48	4	1	Natural	Normal	Normal		3100		1.55	2.4025	23.7253	19.9792
No		Yes	8	No			Yes	No	Housewife	Senior High School	3	155	55	45	2	0		SC	SC		3500		1.55	2.4025	22.8928	18.7305
Yes	5	No	0	No			Yes	No	Self-employee	Junior high school	5	157	60	52	2	0		Normal	Normal	Epis	2900		1.57	2.4649	24.3418	21.0962
No		No	0	No			Yes	Yes	Private employee	Senior High School	3	146	50	38	1	0		First	SC		2700		1.46	2.1316	23.4566	17.827
No		No	0	No			Yes	No	Private employee	Senior High School	3	149	51	43	1	0		First	SC		2800		1.49	2.2201	22.9719	19.3685
No		Yes	6	No			Yes	No	Private employee	Vocational school	3	143	47	40	2	0		Normal	SC		2900		1.43	2.0449	22.984	19.5609
No		No	0	No			Yes	No	Housewife	Junior high school	1	158	79	70	1	0		First	Normal	Epis	3100		1.58	2.4964	31.6456	28.0404
No		No	0	No			Yes	No	Self-employee	Elementary school	2	153	47	40	2	0		Normal	Normal		2800		1.53	2.3409	20.0777	17.0874
No		No	0	No			Yes	Yes	Housewife	Elementary school	2	145	56	47	2	0		Normal	Normal		2800		1.45	2.1025	26.635	22.3543
No		Yes	7	No			Yes	Yes	Private employee	Junior high school	2	159	63	50	2	0		Normal	Normal		3900		1.59	2.5281	24.9199	19.7777
No		No	0	No			Yes	No	Housewife	Junior high school	3	155	45	57	2	0		SC	SC		3300		1.55	2.4025	18.7305	23.7253
No		No	0	No			Yes	Yes	Private employee	Senior High School	2	157	50	62	1	0		First	Normal	Epis	3000		1.57	2.4649	20.2848	25.1532
No		No	0	No			No	No	Housewife	Senior High School	2	159	78	69	3	0		Normal	Normal		3000		1.59	2.5281	30.8532	27.2932
No		No	0	No			Yes	No	Self-employee	Elementary school	3	144	79	68	5	0		Normal	Normal		2900		1.44	2.0736	38.098	32.7932
Yes	3	Yes	5	No			No	Yes	Private employee	Senior High School	3	160	70	60	2	0		Normal	Normal	Epis	3000		1.6	2.56	27.3437	23.4375
No		No	0	No			No	No	Housewife	Elementary school	2	157	78	65	2	0		Normal	Normal		2700		1.57	2.4649	31.6443	26.3702
No		No	0	No			Yes	No	Housewife	Elementary school	3	157	45	53	2	0		Normal	Normal		2500		1.57	2.4649	18.2563	21.5019
No		No	0	No			Yes	Yes	Self-employee	Senior High School	1	155	46	57	2	0		Normal	Normal	Epis	3500		1.55	2.4025	19.1467	23.7253
No		No	0	No			Yes	No	Housewife	Junior high school	1	160	68	59	3	0		Normal	Normal		3000		1.6	2.56	26.5625	23.0469
No		No	0	Yes	<1mo	>1x/week	Yes	No	Private employee	Vocational school	1	158	70	62	1	0		First	Normal	Epis	3200		1.58	2.4964	28.0404	24.8358
Yes	6	Yes	6	Yes	<1mo	>1x/week	Yes	Yes	Midwifery	Diploma	6	153	59	49	4	0		Normal	Normal		3300		1.53	2.3409	25.204	20.9321
No		No	0	No			Yes	Yes	Private employee	Junior high school	1	163	69	60	3	0		Normal	Normal		2900		1.63	2.6569	25.9701	22.5827
No		No	0	No			Yes	No	Private employee	Senior High School	1	160	62	54	1	0		First	Normal	Epis	2800		1.6	2.56	24.2187	21.0937
No		No	0	No			Yes	No	Private employee	Senior High School	2	150	75	68	2	0		Normal	Normal		2900		1.5	2.25	33.3333	30.2222
No		No	0	No			No	No	Housewife	Senior High School	2	153	62	53	2	0		SC	SC		2900		1.53	2.3409	26.4855	22.6409
Yes	4	Yes	7	No			No	Yes	Housewife	Senior High School	6	153	86	76	2	0		Normal	Normal		3000		1.53	2.3409	36.738	32.4661
No		Yes	5	No			Yes	Yes	Private employee	Vocational school	2	155	55	44	2	0		Normal	Normal		3000		1.55	2.4025	22.8928	18.3143
No		Yes	8	No			Yes	Yes	Self-employee	Elementary school	2	155	60	51	5	0		Normal	Normal		2600		1.55	2.4025	24.974	21.2279
No		No	0	No			Yes	No	Housewife	Senior High School	2	148	52	42	2	0		Normal	Normal		2900		1.48	2.1904	23.74	19.1746
No		No	0	No			Yes	Yes	Government employees	Bachelor	2	143	55	47	3	0		Normal	Normal		2900		1.43	2.0449	26.8962	22.984
Yes	2	Yes	5	No			Yes	No	Private employee	Vocational school	2	146	49	41	1	0		First	Normal	Epis	2800		1.46	2.1316	22.9874	19.2344
No		No	0	No			Yes	No	Private employee	Senior High School	2	153	56	47	1	0		First	Normal	Epis	2700		1.53	2.3409	23.9224	20.0777
No		No	0	Yes	>1 mo	<1x/week	Yes	No	Private employee	Junior high school	2	155	62	51	4	1	Natural	Normal	Normal		3100		1.55	2.4025	25.8065	21.2279
No		No	0	No			No	No	Self-employee	Vocational school	2	165	77	63	5	1	Natural	Normal	Normal		4100		1.65	2.7225	28.2828	23.1405
No		Yes	8	No			No	Yes	Housewife	Junior high school	2	160	78	69	3	0		Normal	Normal		3000		1.6	2.56	30.4687	26.9531
No		Yes	3	No			Yes	No	Housewife	Senior High School	2	150	58	49	1	0		First	Normal	Epis	3000		1.5	2.25	25.7778	21.7778
No		No	0	No			No	Yes	Housewife	Senior High School	2	155	61	51	1	0		First	Normal	Epis	2700		1.55	2.4025	25.3902	21.2279
Yes	3	No	0	No			Yes	Yes	Private employee	Junior high school	4	153	58	50	5	1	Natural	Normal	Normal		3400		1.53	2.3409	24.7768	21.3593
No		Yes	4	No			No	No	Private employee	Junior high school	2	144	60	49	2	0		SC	SC		3800		1.44	2.0736	28.9352	23.6304
No		No	0	No			Yes	No	Housewife	Junior high school	2	147	58	51	4	0		Normal	Normal		3100		1.47	2.1609	26.8407	23.6013
No		Yes	4	No			Yes	No	Private employee	Senior High School	2	147	58	52	2	0		Normal	Normal		2500		1.47	2.1609	26.8407	24.064
No		No	0	No			Yes	No	Private employee	Senior High School	2	154	57	50	2	0		Normal	Normal		3100		1.54	2.3716	24.0344	21.0828
No		No	0	No			Yes	No	Private employee	Senior High School	2	149	51	39	2	0		Normal	Normal		2900		1.49	2.2201	22.9719	17.5668
No		No	0	No			No	Yes	Private employee	Senior High School	1	155	56	43	2	0		SC	SC		3300		1.55	2.4025	23.3091	17.898
Yes	3	No	0	No			No	No	Housewife	Senior High School	4	161	78	66	3	0		Normal	Normal		3300		1.61	2.5921	30.0914	25.462
No		Yes	5	No			Yes	No	Private employee	Vocational school	1	153	60	52	4	0		Normal	Normal		2700		1.53	2.3409	25.6312	22.2137
Yes	5	Yes	3	No			No	No	Self-employee	Junior high school	5	151	58	51	2	0		Normal	Normal		3000		1.51	2.2801	25.4375	22.3674
No		No	0	Yes	<1mo	>1x/week	Yes	No	Private employee	Senior High School	1	147	52	43	1	0		First	Normal		2500		1.47	2.1609	24.064	19.8991
No		No	0	No			No	No	Housewife	Senior High School	1	152	52	41	2	0		SC	SC		3000		1.52	2.3104	22.5069	17.7458
No		No	0	No			Yes	No	Housewife	Elementary school	1	150	54	45	5	0		Normal	Normal		2800		1.5	2.25	24	20
No		No	0	No			Yes	No	Self-employee	Senior High School	1	163	79	67	2	1	Natural	Normal	Normal		2500		1.63	2.6569	29.7339	25.2174
No		Yes	6	No			Yes	Yes	Housewife	Senior High School	3	153	60	49	1	0		First	Normal	Epis	3000		1.53	2.3409	25.6312	20.9321
No		No	0	No			Yes	Yes	Midwifery	Diploma	3	151	60	53	2	0		Normal	Normal		2900		1.51	2.2801	26.3146	23.2446
No		Yes	4	No			Yes	No	Private employee	vocational school	3	153	62	53	4	1	Natural	Normal	Normal		4200		1.53	2.3409	26.4855	22.6409
Yes	6	No	0	No			Yes	No	Self-employee	Junior high school	6	149	56	49	3	0		Normal	Normal		2800		1.49	2.2201	25.2241	22.0711
No		No	0	No			No	No	Housewife	Senior High School	3	150	59	48	2	0		Normal	Normal		3000		1.5	2.25	26.2222	21.3333
No		No	0	No			Yes	No	Housewife	Elementary school	3	156	55	48	4	0		Normal	Normal		3000		1.56	2.4336	22.6003	19.7239
No		No	0	No			Yes	No	Private employee	Senior High School	3	153	58	50	1	0		First	Normal	Epis	2500		1.53	2.3409	24.7768	21.3593
No		No	0	Yes	<1mo	>1x/week	Yes	No	Housewife	Senior High School	3	149	49	42	1	0		First	Normal	Epis	3000		1.49	2.2201	22.0711	18.9181
No		No	0	No			Yes	No	Private employee	Senior High School	3	161	78	68	1	0		First	Normal	Epis	3500		1.61	2.5921	30.0914	26.2336
No		No	0	No			Yes	Yes	Private employee	Vocational school	3	170	81	72	5	0		Normal	Normal		3100		1.7	2.89	28.0277	24.9135
No		No	0	No			Yes	No	Private employee	Senior High School	3	154	59	50	2	0		SC	SC		3900		1.54	2.3716	24.8777	21.0828
No		No	0	Yes	<1mo	>1x/week	No	No	Private employee	Senior High School	3	146	47	40	3	1	Natural	Normal	Normal		3000		1.46	2.1316	22.0492	18.7652
No		No	0	No			Yes	Yes	Private employee	Senior High School	2	152	59	49	3	0		Normal	Normal		3200		1.52	2.3104	25.5367	21.2084
Yes	2	No	0	No			Yes	No	Housewife	Senior High School	2	157	61	53	3	0		Normal	Normal		2500		1.57	2.4649	24.7475	21.5019
No		No	0	Yes	>1 mo	<1x/week	No	No	Housewife	Senior High School	3	157	65	55	5	0		Normal	Normal		3000		1.57	2.4649	26.3702	22.3133
No		No	0	No			Yes	No	Private employee	Senior High School	3	157	68	58	2	0		Normal	Normal		3200		1.57	2.4649	27.5873	23.5304
No		No	0	No			Yes	No	Private employee	Senior High School	2	145	60	51	3	1	Natural	Normal	Normal		2500		1.45	2.1025	28.5375	24.2568
No		No	0	Yes	>1 mo	>1x/week	Yes	No	Private employee	Senior High School	3	163	77	67	2	0		Normal	Normal		2800		1.63	2.6569	28.9811	25.2174
No		No	0	No			Yes	Yes	Housewife	No school	3	156	68	59	7	0		Normal	Normal		3200		1.56	2.4336	27.9421	24.2439
No		No	0	No			Yes	No	Private employee	Senior High School	2	153	59	52	3	0		Normal	Normal		2800		1.53	2.3409	25.204	22.2137
No		No	0	Yes	>1 mo	>1x/week	Yes	No	Private employee	Senior High School	2	159	75	65	2	0		Normal	Normal		2900		1.59	2.5281	29.6665	25.711
No		Yes	4	No			Yes	No	Private employee	Senior High School	2	157	65	53	1	0		First	Normal	Epis	3000		1.57	2.4649	26.3702	21.5019
No		Yes	4	No			Yes	No	Housewife	Elementary school	2	149	63	55	4	1	Natural	Normal	Normal		2800		1.49	2.2201	28.3771	24.7737
Yes	3	Yes	4	No			Yes	No	Housewife	Senior High School	3	150	61	52	3	0		Normal	Normal		2500		1.5	2.25	27.1111	23.1111
No		No	0	No			Yes	No	Private employee	Senior High School	1	155	50	41	1	0		First	Normal	Epis	3200		1.55	2.4025	20.8117	17.0656
No		No	0	No			Yes	No	Housewife	No school	1	158	62	53	3	0		Normal	Normal		3300		1.58	2.4964	24.8358	21.2306
No		No	0	No			Yes	No	Self-employee	Senior High School	1	159	70	63	4	1	Natural	Normal	Normal		3300		1.59	2.5281	27.6888	24.9199
No		No	0	No			No	No	Housewife	Vocational school	1	156	70	63	3	0		Normal	Normal		2900		1.56	2.4336	28.764	25.8876
No		No	0	No			Yes	No	Housewife	Junior high school	3	149	62	51	3	0		Normal	Normal		2900		1.49	2.2201	27.9267	22.9719
No		No	0	No			No	Yes	Housewife	Elementary school	3	152	58	50	2	0		Normal	Normal		2600		1.52	2.3104	25.1039	21.6413
No		No	0	No			No	No	Housewife	Senior High School	3	165	76	70	2	0		Normal	Normal		3000		1.65	2.7225	27.9155	25.7117
Yes	4	No	0	No			No	No	Housewife	Elementary school	4	150	53	43	2	0		Normal	Normal		2500		1.5	2.25	23.5556	19.1111
No		No	0	No			Yes	No	Private employee	Junior high school	3	150	77	68	2	0		Normal	Normal		2700		1.5	2.25	34.2222	30.2222
No		No	0	No			Yes	No	Housewife	Elementary school	3	157	75	67	2	0		Normal	Normal	Epis	3500		1.57	2.4649	30.4272	27.1816
No		No	0	No			Yes	Yes	Teacher	Bachelor	3	150	68	62	3	0		Normal	Normal		3200		1.5	2.25	30.2222	27.5556
No		No	0	No			Yes	No	Private employee	Vocational school	3	155	60	52	2	0		SC	SC		3500		1.55	2.4025	24.974	21.6441
No		No	0	Yes	>1 mo	>1x/week	Yes	No	Midwifery	Bachelor	3	160	68	61	1	0		First	Normal	Epis	3500		1.6	2.56	26.5625	23.8281
No		No	0	No			Yes	No	Housewife	Elementary school	3	148	57	49	5	1	Natural	Normal	Normal		3000		1.48	2.1904	26.0226	22.3703
No		No	0	No			Yes	No	Private employee	Senior High School	3	150	56	48	1	0		First	Normal	Epis	3200		1.5	2.25	24.8889	21.3333
Yes	5	Yes	7	No			Yes	Yes	Private employee	Senior High School	5	157	65	56	3	1	Natural	Normal	Normal	Epis	2800		1.57	2.4649	26.3702	22.719
No		No	0	No			No	Yes	Private employee	Vocational school	2	155	69	62	2	0		Normal	Normal		2800		1.55	2.4025	28.7201	25.8065
No		Yes	7	No			Yes	No	Housewife	Elementary school	2	153	69	60	2	0		Normal	Normal		2700		1.53	2.3409	29.4758	25.6312
No		No	0	No			Yes	No	Self-employee	Elementary school	2	157	70	63	5	0		Normal	Normal		2900		1.57	2.4649	28.3987	25.5588
No		No	0	No			No	No	Housewife	Junior high school	1	156	73	64	2	0		Normal	Normal		3500		1.56	2.4336	29.9967	26.2985
No		No	0	No			Yes	No	Housewife	Senior High School	1	145	51	43	1	0		First	Normal	Epis	2600		1.45	2.1025	24.2568	20.4518
No		No	0	No			Yes	No	Private employee	Senior High School	1	150	74	65	3	0		Normal	Normal		3700		1.5	2.25	32.8889	28.8889
No		No	0	No			Yes	Yes	Housewife	Senior High School	1	153	75	67	3	0		Normal	Normal		2500		1.53	2.3409	32.039	28.6215
Yes	2	No	0	No			Yes	No	Housewife	Junior high school	2	150	68	61	4	0		Normal	Normal		2500		1.5	2.25	30.2222	27.1111
No		Yes	8	No			No	No	Private employee	Senior High School	1	159	72	65	2	0		Normal	Normal		2800		1.59	2.5281	28.4799	25.711
No		No	0	No			Yes	No	Private employee	Senior High School	1	155	54	45	1	0		First	Normal	Epis	3200		1.55	2.4025	22.4766	18.7305
No		No	0	No			Yes	No	Self-employee	No school	1	157	67	60	4	0		Normal	Normal		3300		1.57	2.4649	27.1816	24.3418
No		No	0	No			Yes	No	Private employee	Senior High School	3	149	58	51	1	0		First	Normal	Epis	2500		1.49	2.2201	26.1249	22.9719
No		No	0	No			Yes	No	Private employee	Senior High School	3	152	58	52	3	0		Normal	Normal		2500		1.52	2.3104	25.1039	22.5069
No		Yes	7	No			Yes	No	Private employee	Senior High School	3	153	79	71	3	0		Normal	Normal		3800		1.53	2.3409	33.7477	30.3302
Yes	4	Yes	6	No			Yes	Yes	Housewife	Senior High School	5	149	59	52	2	0		Normal	Normal		2600		1.49	2.2201	26.5754	23.4224
No		No	0	Yes	>1 mo	>1x/week	No	No	Teacher	Bachelor	2	163	65	57	3	0		Normal	Normal		3000		1.63	2.6569	24.4646	21.4536
No		No	0	No			Yes	No	Housewife	Elementary school	3	156	49	42	2	0		Normal	Normal		2700		1.56	2.4336	20.1348	17.2584
No		No	0	No			Yes	Yes	Government employees	Bachelor	3	151	69	62	4	0		Normal	Normal		2800		1.51	2.2801	30.2618	27.1918
No		No	0	Yes	>1 mo	>1x/week	Yes	No	Housewife	Junior high school	3	143	57	50	2	0		Normal	SC		3100		1.43	2.0449	27.8742	24.4511
Yes	3	Yes	5	No			No	Yes	Housewife	Senior High School	3	160	78	70	2	0		Normal	Normal		3100		1.6	2.56	30.4687	27.3437
No		No	0	No			No	No	Housewife	Senior High School	3	157	62	53	1	0		First	SC		2800		1.57	2.4649	25.1532	21.5019
No		Yes	7	No			Yes	Yes	Housewife	Senior High School	2	165	71	62	2	0		Normal	Normal		2700		1.65	2.7225	26.079	22.7732
Yes	5	Yes	7	No			Yes	No	Housewife	Junior high school	5	149	51	43	3	0		Normal	Normal		2800		1.49	2.2201	22.9719	19.3685
No		No	0	Yes	<1mo	>1x/week	Yes	No	Private employee	Junior high school	1	150	65	56	4	1	Natural	First	Normal		3700		1.5	2.25	28.8889	24.8889
No		No	0	No			Yes	No	Housewife	Vocational school	1	149	58	50	2	0		Normal	Normal		3600		1.49	2.2201	26.1249	22.5215
No		No	0	No			Yes	No	Housewife	Junior high school	1	152	67	60	3	0		Normal	Normal		3700		1.52	2.3104	28.9993	25.9695
No		No	0	No			Yes	No	Housewife	Senior High School	1	156	76	65	1	0		First	SC		3600		1.56	2.4336	31.2295	26.7094
No		No	0	No			Yes	Yes	Private employee	Senior High School	1	160	82	74	2	0		SC	SC		4400		1.6	2.56	32.0312	28.9062
No		No	0	No			Yes	No	Private employee	Junior high school	1	154	67	60	3	0		Normal	Normal		3600		1.54	2.3716	28.251	25.2994
No		No	0	No			Yes	No	Housewife	Elementary school	2	149	63	55	2	0		Normal	Normal		2800		1.49	2.2201	28.3771	24.7737
Yes	3	Yes	5	No			Yes	No	Housewife	Senior high school	4	158	59	42	4	0		Normal	Normal		2500		1.58	2.4964	23.634	16.8242
No		No	0	No			Yes	No	Self-employee	Elementary school	2	154	67	60	2	0		SC	SC		3000		1.54	2.3716	28.251	25.2994
No		No	0	No			Yes	No	Housewife	Junior high school	2	145	58	49	2	0		Normal	Normal		3000		1.45	2.1025	27.5862	23.3056
No		No	0	No			Yes	No	Housewife	Elementary school	2	159	70	62	2	0		Normal	Normal		2500		1.59	2.5281	27.6888	24.5243
No		No	0	No			Yes	No	Private employee	Senior high school	2	154	76	69	3	0		Normal	Normal		2800		1.54	2.3716	32.0459	29.0943
No		No	0	No			Yes	Yes	Housewife	Junior high school	2	151	71	62	1	0		First	Normal	Epis	3300		1.51	2.2801	31.139	27.1918
No		No	0	Yes	<1mo	>1x/week	Yes	No	Self-employee	Senior high school	2	149	50	43	2	0		Normal	Normal		2600		1.49	2.2201	22.5215	19.3685
No		No	0	No			Yes	No	Private employee	Senior high school	2	152	52	45	2	0		SC	SC		3200		1.52	2.3104	22.5069	19.4771
No		No	0	No			Yes	No	Housewife	Junior high school	2	150	61	54	3	1	Natural	Normal	Normal		2600		1.5	2.25	27.1111	24
No		No	0	No			Yes	No	Private employee	Senior high school	2	153	65	57	1	0		First	SC		3400		1.53	2.3409	27.7671	24.3496
Yes	6	Yes	4	No			Yes	No	Housewife	Senior high school	6	156	58	51	1	0		First	SC		2900		1.56	2.4336	23.833	20.9566
No		No	0	No			Yes	Yes	Housewife	Junior high school	1	150	48	42	1	0		First	SC		3000		1.5	2.25	21.3333	18.6667
No		No	0	No			Yes	No	Housewife	Senior high school	1	149	65	57	1	0		First	Normal	Epis	2800		1.49	2.2201	29.278	25.6745
No		Yes	4	No			Yes	Yes	Private employee	Senior high school	1	164	74	65	1	0		First	Normal	Epis	2500		1.64	2.6896	27.5134	24.1672
No		Yes	7	No			Yes	No	Housewife	Senior high school	3	151	65	56	2	0		Normal	Normal		2500		1.51	2.2801	28.5075	24.5603
Yes	4	Yes	9	No			No	No	Self-employee	Junior high school	4	152	42	33	3	1	Natural	Normal	Normal		2500		1.52	2.3104	18.1787	14.2832
No		Yes	5	No			Yes	No	Housewife	Elementary school	3	150	56	48	2	0		SC	SC		2600		1.5	2.25	24.8889	21.3333
Yes	5	Yes	7	No			Yes	No	Private employee	Vocational school	5	147	53	44	1	0		First	Normal	Epis	2500		1.47	2.1609	24.5268	20.3619
Yes	3	Yes	4	No			Yes	Yes	Housewife	Senior high school	3	152	52	45	3	0		Normal	Normal		3100		1.52	2.3104	22.5069	19.4771
No		No	0	No			No	No	Housewife	Elementary school	3	158	65	57	2	0		Normal	Normal		2700		1.58	2.4964	26.0375	22.8329
No		No	0	No			Yes	No	Housewife	Senior high school	3	150	67	58	1	0		First	Normal		2700		1.5	2.25	29.7778	25.7778
No		No	0	No			Yes	No	Private employee	Senior high school	3	157	59	49	1	0		First	Normal		2800		1.57	2.4649	23.9361	19.8791
No		No	0	No			Yes	No	Housewife	Elementary school	3	144	46	38	3	0		Normal	Normal		2600		1.44	2.0736	22.1836	18.3256
No		Yes	4	No			Yes	No	Housewife	Senior high school	2	148	70	61	3	0		Normal	Normal		3200		1.48	2.1904	31.9576	27.8488
Yes	5	Yes	6	No			Yes	No	Government employees	Bachelor	6	145	60	51	2	0		Normal	Normal		2900		1.45	2.1025	28.5375	24.2568
No		No	0	No			Yes	No	Housewife	Elementary school	2	149	60	52	3	0		Normal	Normal		2500		1.49	2.2201	27.0258	23.4224
No		No	0	No			Yes	Yes	Housewife	Junior high school	2	151	53	45	3	0		Normal	Normal		2500		1.51	2.2801	23.2446	19.736
No		No	0	No			Yes	No	Housewife	Senior high school	2	145	57	48	3	0		Normal	Normal		3800		1.45	2.1025	27.1106	22.83
No		No	0	Yes	>1 mo	>1x/week	No	No	Midwifery	Diploma	2	149	57	51	2	0		Normal	Normal		2500		1.49	2.2201	25.6745	22.9719
No		No	0	No			Yes	No	Self-employee	Elementary school	2	153	58	49	4	0		Normal	Normal		3100		1.53	2.3409	24.7768	20.9321
No		No	0	No			Yes	No	Housewife	Junior high school	2	150	78	70	4	0		Normal	Normal		3500		1.5	2.25	34.6667	31.1111
No		No	0	No			Yes	No	Self-employee	Vocational school	2	153	67	60	2	0		SC	SC		3000		1.53	2.3409	28.6215	25.6312
Yes	4	Yes	6	No			Yes	No	Housewife	Elementary school	6	146	58	49	4	0		Normal	Normal		2900		1.46	2.1316	27.2096	22.9874
No		No	0	No			Yes	No	Housewife	Senior high school	1	155	53	45	2	0		SC	SC		3500		1.55	2.4025	22.0604	18.7305
No		No	0	No			Yes	No	Housewife	Junior high school	1	154	56	45	1	0		First	SC		3400		1.54	2.3716	23.6128	18.9745
No		No	0	No			Yes	No	Housewife	Senior high school	1	160	72	63	3	0		Normal	Normal		3500		1.6	2.56	28.125	24.6094
No		No	0	No			Yes	No	Housewife	Elementary school	1	144	46	38	2	0		Normal	Normal		2500		1.44	2.0736	22.1836	18.3256
No		No	0	No			Yes	Yes	Private employee	Junior high school	1	150	61	53	3	0		Normal	Normal		3000		1.5	2.25	27.1111	23.5556
No		No	0	No			Yes	No	Self-employee	Senior high school	1	156	64	55	2	0		Normal	Normal		3200		1.56	2.4336	26.2985	22.6003
No		Yes	9	No			Yes	Yes	Private employee	Senior high school	2	143	54	46	1	0		First	Normal	Epis	2800		1.43	2.0449	26.4072	22.495
No		No	0	No			Yes	No	Housewife	Elementary school	2	157	67	59	3	0		Normal	Normal		3200		1.57	2.4649	27.1816	23.9361
No		Yes	5	No			Yes	No	Housewife	Junior high school	1	149	60	52	2	0		Normal	Normal		2500		1.49	2.2201	27.0258	23.4224
Yes	3	Yes	9	No			No	Yes	Private employee	Senior high school	3	145	58	47	1	0		First	Normal	Epis	3300		1.45	2.1025	27.5862	22.3543
Yes	4	No	0	No			Yes	No	Housewife	Senior high school	4	161	78	68	3	0		Normal	Normal		2500		1.61	2.5921	30.0914	26.2336
No		No	0	No			No	No	Self-employee	Junior high school	3	154	60	47	4	0		Normal	Normal		3000		1.54	2.3716	25.2994	19.8178
No		No	0	No			No	No	Housewife	Junior high school	3	154	61	52	3	0		Normal	Normal		3400		1.54	2.3716	25.721	21.9261
No		Yes	6	No			Yes	No	Housewife	Junior high school	3	160	78	69	1	0		First	Normal	Epis	3100		1.6	2.56	30.4687	26.9531
No		Yes	8	No			Yes	No	Private employee	Senior high school	3	148	50	39	2	0		Normal	Normal		3000		1.48	2.1904	22.8269	17.805
No		No	0	No			Yes	Yes	Housewife	Senior high school	3	153	62	54	2	0		Normal	Normal		3500		1.53	2.3409	26.4855	23.0681
Yes	4	Yes	5	No			Yes	Yes	Housewife	Senior high school	4	149	50	42	2	0		SC	SC		3300		1.49	2.2201	22.5215	18.9181
No		Yes	9	No			Yes	No	Government employees	Bachelor	3	147	55	43	2	0		SC	SC		3100		1.47	2.1609	25.4524	19.8991
No		No	0	No			Yes	No	Housewife	Senior high school	2	150	56	47	3	0		Normal	Normal		3000		1.5	2.25	24.8889	20.8889
No		No	0	No			Yes	No	Self-employee	Senior High School	2	149	48	40	2	0		Normal	Normal		2500		1.49	2.2201	21.6206	18.0172
No		No	0	No			Yes	No	Housewife	Senior high school	1	157	65	56	3	0		Normal	Normal		3100		1.57	2.4649	26.3702	22.719
No		No	0	Yes	>1 mo	>1x/week	Yes	No	Midwifery	Diploma	1	152	66	55	3	0		Normal	Normal		3100		1.52	2.3104	28.5665	23.8054
Yes	5	Yes	5	No			Yes	No	Housewife	Junior high school	5	155	63	54	4	0		Normal	Normal		2900		1.55	2.4025	26.2227	22.4766
No		Yes	8	No			Yes	Yes	Private employee	Senior high school	1	160	65	56	3	0		Normal	Normal		2700		1.6	2.56	25.3906	21.875
No		No	0	No			Yes	No	Housewife	Senior high school	2	156	57	48	2	0		Normal	Normal		3000		1.56	2.4336	23.4221	19.7239
No		No	0	No			Yes	Yes	Housewife	Junior high school	2	155	58	47	1	0		First	Normal	Epis	3100		1.55	2.4025	24.1415	19.563
Yes	3	No	0	No			Yes	No	Private employee	Vocational school	3	150	61	52	1	0		First	Normal	Epis	3100		1.5	2.25	27.1111	23.1111
Yes	6	Yes	6	No			No	Yes	Self-employee	Senior high school	6	156	59	49	3	0		Normal	Normal		3400		1.56	2.4336	24.2439	20.1348
Yes	4	Yes	5	No			Yes	No	Housewife	Elementary school	4	160	79	62	3	0		Normal	Normal		3300		1.6	2.56	30.8594	24.2187
No		Yes	8	No			Yes	No	Housewife	Elementary school	1	145	54	45	4	0		Normal	Normal		3100		1.45	2.1025	25.6837	21.4031
No		No	0	No			Yes	No	Housewife	Junior high school	1	150	56	47	4	0		Normal	Normal		3600		1.5	2.25	24.8889	20.8889
No		Yes	8	No			Yes	No	Housewife	Junior high school	1	154	67	55	4	0		Normal	Normal		2800		1.54	2.3716	28.251	23.1911
No		No	0	No			Yes	No	Private employee	Senior high school	1	143	56	47	1	0		First	SC		3300		1.43	2.0449	27.3852	22.984
No		No	0	No			Yes	No	Private employee	Vocational school	1	165	81	72	2	0		Normal	Normal		3100		1.65	2.7225	29.7521	26.4463
No		Yes	6	No			Yes	No	Private employee	Senior high school	1	149	59	50	2	0		SC	SC		3300		1.49	2.2201	26.5754	22.5215
Yes	4	No	0	No			Yes	Yes	Housewife	Junior high school	5	145	49	40	2	0		SC	SC		4100		1.45	2.1025	23.3056	19.025
No		Yes	9	No			Yes	No	Housewife	Senior high school	3	161	51	41	2	0		Normal	Normal		2800		1.61	2.5921	19.6752	15.8173
No		No	0	No			Yes	No	Government employees	Bachelor	3	152	71	63	1	0		First	SC		2900		1.52	2.3104	30.7306	27.268
No		Yes	9	No			Yes	Yes	Housewife	Junior high school	3	151	57	46	2	0		SC	SC		3800		1.51	2.2801	24.9989	20.1746
No		Yes	7	No			Yes	No	Housewife	Senior high school	3	150	60	51	2	0		Normal	Normal		3600		1.5	2.25	26.6667	22.6667
No		No	0	No			Yes	No	Self-employee	Senior high school	3	165	72	63	3	0		Normal	Normal		3300		1.65	2.7225	26.4463	23.1405
Yes	6	Yes	5	No			Yes	No	Housewife	Senior high school	6	154	56	46	1	0		First	Normal	Epis	3100		1.54	2.3716	23.6128	19.3962
No		Yes	8	No			Yes	No	Housewife	Junior high school	2	149	59	40	3	0		Normal	Normal		3200		1.49	2.2201	26.5754	18.0172
No		No	0	No			Yes	No	Housewife	Vocational school	2	150	59	50	1	0		First	SC		2900		1.5	2.25	26.2222	22.2222
No		Yes	7	No			Yes	No	Government employees	Diploma	1	147	67	56	1	0		First	Normal		2800		1.47	2.1609	31.0056	25.9151
No		No	0	No			Yes	No	Housewife	Senior high school	1	157	69	60	1	0		First	SC		3500		1.57	2.4649	27.993	24.3418
No		Yes	8	No			Yes	No	Housewife	Junior high school	1	143	53	42	4	0		Normal	Normal		3300		1.43	2.0449	25.9181	20.5389
No		No	0	No			Yes	No	Housewife	Vocational school	1	163	68	59	3	0		Normal	Normal		2800		1.63	2.6569	25.5937	22.2063
No		No	0	Yes	<1mo	>1x/week	Yes	No	Teacher	Bachelor	1	157	69	59	1	0		First	Normal	Epis	3200		1.57	2.4649	27.993	23.9361
Yes	3	Yes	5	No			Yes	No	Housewife	Senior high school	3	158	78	68	3	0		Normal	Normal		2500		1.58	2.4964	31.245	27.2392
No		Yes	8	No			Yes	Yes	Housewife	Senior high school	2	145	52	41	1	0		First	SC		3200		1.45	2.1025	24.7325	19.5006
No		No	0	No			Yes	No	Private employee	Junior high school	2	152	53	42	3	0		Normal	Normal		3000		1.52	2.3104	22.9398	18.1787
No		No	0	No			Yes	No	Housewife	Elementary school	2	156	79	70	1	0		First	Normal		2500		1.56	2.4336	32.4622	28.764
Yes	4	No	0	No			Yes	Yes	Private employee	Senior high school	6	155	75	66	1	0		First	Normal	Epis	3100		1.55	2.4025	31.2175	27.4714
No		Yes	4	No			Yes	No	Housewife	Senior high school	1	160	77	64	3	0		Normal	Normal		3800		1.6	2.56	30.0781	25
No		Yes	5	No			Yes	No	Housewife	Vocational school	1	150	67	58	1	0		First	Normal	Epis	2700		1.5	2.25	29.7778	25.7778
No		No	0	No			Yes	No	Housewife	Senior high school	1	157	67	58	3	0		Normal	Normal		2500		1.57	2.4649	27.1816	23.5304
No		No	0	No			Yes	No	Private employee	Senior high school	1	152	56	45	3	0		Normal	Normal		3100		1.52	2.3104	24.2382	19.4771
No		No	0	No			Yes	No	Housewife	Senior high school	1	151	58	47	3	0		Normal	Normal		3000		1.51	2.2801	25.4375	20.6131
No		Yes	9	No			Yes	No	Housewife	Elementary school	1	160	77	66	3	0		Normal	Normal		2700		1.6	2.56	30.0781	25.7812
No		No	0	No			Yes	No	Housewife	Junior high school	1	163	71	60	1	0		First	Normal		2700		1.63	2.6569	26.7229	22.5827
Yes	3	Yes	4	No			Yes	No	Private employee	Senior high school	4	157	76	64	1	0		First	Normal	Epis	3200		1.57	2.4649	30.8329	25.9645
No		Yes	6	No			Yes	No	Housewife	Junior high school	1	155	51	43	5	0		Normal	Normal		2900		1.55	2.4025	21.2279	17.898
No		No	0	No			Yes	No	Housewife	Junior high school	3	157	57	43	4	0		Normal	Normal		3800		1.57	2.4649	23.1247	17.4449
No		No	0	No			Yes	No	Private employee	Senior high school	3	152	68	56	2	0		SC	SC		3500		1.52	2.3104	29.4321	24.2382
No		Yes	8	No			Yes	No	Housewife	Senior high school	3	147	49	40	2	0		Normal	SC		2800		1.47	2.1609	22.6757	18.5108
No		No	0	No			Yes	No	Housewife	Junior high school	3	149	58	47	2	0		Normal	SC		3100		1.49	2.2201	26.1249	21.1702
No		No	0	Yes	>1 mo	<1x/week	Yes	Yes	Private employee	Senior high school	3	158	60	51	2	0		Normal	Normal		2500		1.58	2.4964	24.0346	20.4294
No		No	0	No			Yes	No	Housewife	Senior high school	3	154	65	56	2	0		SC	SC		3700		1.54	2.3716	27.4077	23.6128
No		No	0	No			Yes	No	Self-employee	Senior high school	3	147	54	43	2	0		Normal	Normal		2600		1.47	2.1609	24.9896	19.8991
Yes	4	No	0	No			Yes	No	Housewife	Senior high school	4	150	51	42	1	0		First	SC		2800		1.5	2.25	22.6667	18.6667
No		Yes	6	No			Yes	No	Housewife	Senior high school	3	145	49	40	2	0		Normal	Normal		3400		1.45	2.1025	23.3056	19.025
No		No	0	Yes	<1mo	>1x/week	Yes	No	Self-employee	Junior high school	3	144	50	41	1	0		First	Normal	Epis	3100		1.44	2.0736	24.1127	19.7724
No		No	0	No			Yes	No	Housewife	Elementary school	3	148	56	47	2	0		Normal	Normal		3500		1.48	2.1904	25.5661	21.4573
Yes	2	No	0	No			Yes	No	Housewife	Junior high school	2	150	56	49	2	0		Normal	Normal		3600		1.5	2.25	24.8889	21.7778
No		Yes	9	No			Yes	No	Housewife	Senior high school	1	153	68	58	1	0		First	Normal	Epis	2900		1.53	2.3409	29.0487	24.7768
No		No	0	No			Yes	No	Private employee	Senior high school	1	150	59	58	2	0		SC	SC		3200		1.5	2.25	26.2222	25.7778
No		No	0	No			Yes	No	Private employee	Vocational school	1	149	61	52	3	0		Normal	Normal		3100		1.49	2.2201	27.4762	23.4224
No		No	0	No			Yes	No	Housewife	Elementary school	1	154	58	47	2	0		Normal	Normal		3500		1.54	2.3716	24.4561	19.8178
No		No	0	No			Yes	No	Housewife	Junior high school	1	150	58	49	4	0		Normal	Normal		3300		1.5	2.25	25.7778	21.7778
No		No	0	No			Yes	No	Housewife	Junior high school	1	159	86	75	2	0		Normal	Normal		2500		1.59	2.5281	34.0176	29.6665
No		Yes	8	No			Yes	Yes	Self-employee	Vocational school	1	157	71	63	2	0		Normal	Normal		2800		1.57	2.4649	28.8044	25.5588
Yes	3	Yes	9	Yes	<1mo	>1x/week	Yes	No	Housewife	Senior high school	3	150	77	66	3	0		Normal	Normal		2600		1.5	2.25	34.2222	29.3333
No		Yes	5	No			Yes	No	Housewife	Senior high school	1	160	86	73	3	0		Normal	Normal		3800		1.6	2.56	33.5937	28.5156
No		No	0	Yes	<1mo	>1x/week	Yes	No	Housewife	Senior high school	2	155	74	62	2	0		Normal	Normal		3500		1.55	2.4025	30.8012	25.8065
No		No	0	No			Yes	Yes	Housewife	Senior high school	2	157	65	56	3	0		Normal	Normal		3500		1.57	2.4649	26.3702	22.719
No		Yes	6	No			Yes	No	Housewife	No school	2	159	62	51	5	0		Normal	Normal		4100		1.59	2.5281	24.5243	20.1733
No		No	0	No			Yes	No	Housewife	Senior high school	1	148	45	32	4	0		Normal	Normal		3300		1.48	2.1904	20.5442	14.6092
No		No	0	No			Yes	No	Housewife	Junior high school	1	157	63	54	2	0		Normal	Normal	Epis	2700		1.57	2.4649	25.5588	21.9076
No		No	0	No			Yes	No	Self-employee	Vocational school	1	150	59	49	3	0		Normal	Normal		3300		1.5	2.25	26.2222	21.7778
No		No	0	No			Yes	No	Housewife	Senior high school	1	153	67	58	3	0		Normal	Normal		2800		1.53	2.3409	28.6215	24.7768
No		No	0	No			Yes	No	Housewife	Senior high school	1	152	69	58	2	0		Normal	Normal		3300		1.52	2.3104	29.865	25.1039
No		No	0	No			Yes	Yes	Self-employee	Senior high school	3	149	62	52	1	0		First	Normal	Epis	3000		1.49	2.2201	27.9267	23.4224
No		No	0	No			Yes	No	Private employee	Junior high school	3	154	59	47	1	0		Normal	Normal	Epis	3000		1.54	2.3716	24.8777	19.8178
No		No	0	No			Yes	No	Self-employee	Junior high school	3	150	58	49	2	0		SC	SC		3100		1.5	2.25	25.7778	21.7778
Yes	5	No	0	No			Yes	No	Housewife	Senior high school	5	159	59	49	3	0		Normal	Normal		2900		1.59	2.5281	23.3377	19.3821
No		Yes	9	No			Yes	No	Housewife	Senior high school	2	142	58	46	2	0		Normal	SC		3200		1.42	2.0164	28.7641	22.8129
No		Yes	4	No			Yes	Yes	Housewife	Elementary school	2	156	70	59	2	0		Normal	Normal		2800		1.56	2.4336	28.764	24.2439
No		No	0	Yes	<1mo	>1x/week	Yes	No	Housewife	Bachelor	2	161	74	65	2	0		Normal	Normal		3100		1.61	2.5921	28.5483	25.0762
No		No	0	No			Yes	No	Self-employee	Vocational school	2	149	55	46	4	0		Normal	Normal		2900		1.49	2.2201	24.7737	20.7198
No		No	0	No			Yes	No	Housewife	Senior high school	2	150	58	49	1	0		First	Normal		2900		1.5	2.25	25.7778	21.7778
No		No	0	No			Yes	Yes	Self-employee	Senior high school	1	143	61	50	2	0		Normal	Normal		2900		1.43	2.0449	29.8303	24.4511
No		No	0	No			Yes	No	Self-employee	Vocational school	1	153	65	55	2	0		Normal	Normal		2900		1.53	2.3409	27.7671	23.4952
No		No	0	No			Yes	No	Housewife	Junior high school	1	149	63	51	3	0		Normal	Normal		2800		1.49	2.2201	28.3771	22.9719
No		Yes	9	No			Yes	Yes	Housewife	Senior high school	1	161	79	70	3	0		Normal	Normal		3200		1.61	2.5921	30.4772	27.0051
No		No	0	No			Yes	No	Housewife	Senior high school	1	152	66	55	3	0		Normal	Normal		3200		1.52	2.3104	28.5665	23.8054
No		Yes	8	No			Yes	No	Private employee	Junior high school	1	153	61	50	1	0		First	Normal	Epis	2900		1.53	2.3409	26.0584	21.3593
No		No	0	No			Yes	Yes	Housewife	Senior high school	1	155	81	70	3	0		Normal	Normal		2800		1.55	2.4025	33.7149	29.1363
Yes	3	No	0	No			Yes	No	Housewife	Elementary school	3	152	75	63	1	0		First	Normal	Epis	2500		1.52	2.3104	32.4619	27.268
No		No	0	No			Yes	No	Housewife	Senior high school	1	169	79	70	2	0		Normal	Normal	Epis	3400		1.69	2.8561	27.6601	24.5089
No		No	0	No			Yes	No	Housewife	Senior high school	1	149	65	54	3	0		Normal	Normal		3200		1.49	2.2201	29.278	24.3232
No		No	0	No			Yes	No	Private employee	Senior high school	2	146	78	66	3	0		Normal	Normal		3500		1.46	2.1316	36.5922	30.9627
No		No	0	No			Yes	No	Housewife	Junior high school	3	152	60	47	3	0		Normal	Normal		3400		1.52	2.3104	25.9695	20.3428
No		No	0	No			Yes	No	Housewife	Elementary school	3	143	57	46	3	0		Normal	Normal		3600		1.43	2.0449	27.8742	22.495
No		Yes	9	No			Yes	No	Self-employee	Senior high school	1	147	52	43	2	0		Normal	SC		3200		1.47	2.1609	24.064	19.8991
Yes	6	No	0	No			Yes	No	Self-employee	Elementary school	6	148	82	69	3	0		Normal	Normal		3500		1.48	2.1904	37.4361	31.5011
No		No	0	No			Yes	Yes	Housewife	Junior high school	1	146	60	51	3	0		Normal	Normal		3100		1.46	2.1316	28.1479	23.9257
No		No	0	No			Yes	No	Housewife	Elementary school	1	151	55	44	2	0		Normal	Normal		3500		1.51	2.2801	24.1217	19.2974
No		Yes	8	No			Yes	No	Self-employee	No school	3	152	65	57	6	1	Natural	Normal	Normal		2500		1.52	2.3104	28.1337	24.6711
No		No	0	No			Yes	No	Housewife	Junior high school	3	151	70	62	2	0		Normal	SC		3100		1.51	2.2801	30.7004	27.1918
No		No	0	No			Yes	No	Housewife	Junior high school	3	150	89	80	2	0		SC	SC		2600		1.5	2.25	39.5556	35.5556
No		No	0	No			Yes	No	Private employee	Senior high school	3	153	60	50	3	0		Normal	Normal		2500		1.53	2.3409	25.6312	21.3593
No		No	0	No			Yes	No	Private employee	Senior high school	3	150	62	51	1	0		First	Normal	Epis	2600		1.5	2.25	27.5556	22.6667
No		No	0	No			Yes	No	Housewife	Junior high school	3	140	49	38	2	0		SC	SC		3300		1.4	1.96	25	19.3878
No		No	0	No			Yes	No	Private employee	Senior high school	3	152	70	59	3	0		Normal	Normal		3100		1.52	2.3104	30.2978	25.5367
Yes	4	Yes	8	Yes	>1 mo	>1x/week	Yes	Yes	Private employee	Bachelor	4	152	63	54	1	0		First	Normal	Epis	2900		1.52	2.3104	27.268	23.3726
Yes	3	No	0	No			Yes	Yes	Housewife	Senior high school	3	150	61	50	2	0		Normal	Normal		3200		1.5	2.25	27.1111	22.2222
No		No	0	No			Yes	No	Housewife	Senior high school	1	154	75	63	2	0		Normal	Normal		3200		1.54	2.3716	31.6242	26.5643
No		No	0	No			Yes	No	Private employee	Senior high school	1	154	60	47	1	0		First	SC		2500		1.54	2.3716	25.2994	19.8178
No		No	0	No			Yes	No	Housewife	Senior high school	1	151	66	55	1	0		First	Normal	Epis	3100		1.51	2.2801	28.9461	24.1217
No		No	0	No			Yes	No	Housewife	Senior high school	1	147	56	47	1	0		First	SC		3500		1.47	2.1609	25.9151	21.7502
No		No	0	No			Yes	Yes	Private employee	Vocational school	1	147	64	52	1	0		First	Normal	Epis	2700		1.47	2.1609	29.6173	24.064
No		No	0	No			Yes	No	Housewife	Senior high school	1	160	63	50	3	0		Normal	Normal		3200		1.6	2.56	24.6094	19.5312
No		Yes	7	No			Yes	No	Housewife	Senior high school	1	153	65	56	1	0		First	Normal	Epis	2500		1.53	2.3409	27.7671	23.9224
No		No	0	Yes	>1 mo	<1x/week	Yes	No	Private employee	Senior high school	1	156	79	70	2	0		SC	SC		2800		1.56	2.4336	32.4622	28.764
No		No	0	No			Yes	No	Housewife	Junior high school	1	151	61	50	3	0		Normal	Normal		3000		1.51	2.2801	26.7532	21.9289
No		No	0	No			Yes	No	Self-employee	Senior high school	1	141	52	40	3	0		SC	SC		3300		1.41	1.9881	26.1556	20.1197
Yes	2	Yes	9	No			No	No	Self-employee	Senior high school	2	157	63	53	1	0		First	Normal	Epis	2500		1.57	2.4649	25.5588	21.5019
No		Yes	8	No			Yes	Yes	Housewife	Senior high school	3	146	55	43	1	0		First	Normal	Epis	3400		1.46	2.1316	25.8022	20.1726
No		No	0	No			Yes	No	Self-employee	Elementary school	3	155	71	62	4	0		Normal	Normal		3100		1.55	2.4025	29.5525	25.8065
No		No	0	No			Yes	No	Housewife	Junior high school	3	156	69	60	3	0		Normal	Normal		3000		1.56	2.4336	28.3531	24.6548
No		No	0	No			Yes	Yes	Housewife	Elementary school	3	151	65	53	2	0		Normal	Normal		2500		1.51	2.2801	28.5075	23.2446
No		No	0	No			No	No	Housewife	Senior high school	3	145	61	50	3	0		Normal	Normal		3000		1.45	2.1025	29.0131	23.7812
No		No	0	No			Yes	No	Self-employee	Junior high school	3	147	59	50	5	0		Normal	Normal		3100		1.47	2.1609	27.3034	23.1385
No		No	0	No			Yes	No	Self-employee	Senior high school	3	153	65	55	3	1	Natural	Normal	Normal		3100		1.53	2.3409	27.7671	23.4952
No		Yes	7	No			Yes	No	Housewife	Junior high school	3	152	50	50	1	0		First	Normal		3400		1.52	2.3104	21.6413	21.6413
Yes	4	No	0	No			Yes	No	Housewife	Senior high school	5	155	51	43	4	0		Normal	Normal		3100		1.55	2.4025	21.2279	17.898
No		No	0	No			Yes	No	Housewife	Senior high school	1	156	78	67	1	0		First	Normal	Epis	2800		1.56	2.4336	32.0513	27.5312
No		No	0	No			Yes	No	Private employee	Senior high school	1	148	62	53	1	0		First	SC	Epis	3100		1.48	2.1904	28.3053	24.1965
No		No	0	No			Yes	No	Housewife	Senior high school	1	148	57	46	2	0		Normal	Normal		2600		1.48	2.1904	26.0226	21.0007
No		Yes	9	No			Yes	No	Housewife	Senior high school	1	156	79	70	1	0		First	Normal	Epis	2800		1.56	2.4336	32.4622	28.764
No		No	0	No			Yes	Yes	Private employee	Senior high school	1	152	77	68	5	0		Normal	Normal		3200		1.52	2.3104	33.3276	29.4321
No		No	0	No			No	No	Private employee	Junior high school	1	151	54	49	1	0		First	Normal	Epis	2800		1.51	2.2801	23.6832	21.4903
No		No	0	No			Yes	No	Self-employee	Senior high school	3	155	82	72	2	0		Normal	Normal		3000		1.55	2.4025	34.1311	29.9688
Yes	5	Yes	3	No			Yes	No	Housewife	Senior high school	6	153	76	65	2	0		Normal	SC		2800		1.53	2.3409	32.4661	27.7671
No		No	0	No			Yes	No	Self-employee	Diploma	3	150	55	46	1	0		First	Normal	Epis	3200		1.5	2.25	24.4444	20.4444
No		Yes	6	No			Yes	Yes	Housewife	Senior high school	3	155	65	54	2	0		Normal	Normal		3000		1.55	2.4025	27.0552	22.4766
No		No	0	No			Yes	No	Housewife	Diploma	3	143	56	45	2	0		Normal	Normal		3100		1.43	2.0449	27.3852	22.006
No		No	0	No			Yes	No	Housewife	Senior high school	3	152	78	70	4	0		Normal	Normal		3100		1.52	2.3104	33.7604	30.2978
No		No	0	No			Yes	No	Private employee	Senior high school	2	148	70	60	3	0		Normal	SC		4400		1.48	2.1904	31.9576	27.3923
No		Yes	8	No			Yes	No	Housewife	Senior high school	3	150	64	55	1	0		First	Normal	Epis	3000		1.5	2.25	28.4444	24.4444
No		No	0	No			Yes	No	Housewife	Elementary school	3	160	61	52	3	0		Normal	Normal		2800		1.6	2.56	23.8281	20.3125
No		No	0	No			Yes	No	Private employee	Vocational school	3	148	56	46	4	0		Normal	Normal		3800		1.48	2.1904	25.5661	21.0007
No		Yes	7	No			Yes	No	Housewife	Elementary school	3	156	79	70	3	0		Normal	Normal		2700		1.56	2.4336	32.4622	28.764
No		No	0	No			Yes	Yes	Housewife	Senior high school	3	160	71	60	1	0		First	SC	Epis	3100		1.6	2.56	27.7344	23.4375
No		No	0	No			Yes	No	Housewife	Junior high school	3	146	59	50	2	0		SC	SC		3000		1.46	2.1316	27.6787	23.4566
Yes	3	Yes	9	No			Yes	No	Self-employee	Junior high school	6	160	62	50	2	0		Normal	Normal		2800		1.6	2.56	24.2187	19.5312
No		No	0	No			Yes	No	Private employee	Senior high school	1	147	58	47	3	0		Normal	Normal		3000		1.47	2.1609	26.8407	21.7502
No		No	0	No			Yes	No	Housewife	Senior high school	1	158	78	66	2	0		Normal	Normal		3400		1.58	2.4964	31.245	26.4381
No		No	0	Yes	>1 mo	>1x/week	Yes	Yes	Self-employee	Bachelor	1	142	71	63	3	0		Normal	Normal		3200		1.42	2.0164	35.2113	31.2438
No		No	0	No			Yes	No	Housewife	Elementary school	1	155	72	60	3	0		Normal	Normal		2900		1.55	2.4025	29.9688	24.974
No		No	0	No			Yes	No	Private employee	Senior high school	1	149	60	51	1	0		First	Normal	Epis	2800		1.49	2.2201	27.0258	22.9719
No		No	0	No			Yes	No	Private employee	Vocational school	1	149	56	46	5	0		Normal	Normal		3200		1.49	2.2201	25.2241	20.7198
No		No	0	No			Yes	No	Self-employee	Junior high school	1	160	66	56	4	0		Normal	Normal		2500		1.6	2.56	25.7812	21.875
Yes	6	Yes	6	No			Yes	No	Housewife	Senior high school	6	156	72	64	1	0		First	Normal		3200		1.56	2.4336	29.5858	26.2985
No		No	0	No			Yes	No	Private employee	Vocational school	1	160	62	50	2	0		Normal	Normal		3000		1.6	2.56	24.2187	19.5312
No		No	0	No			Yes	No	Housewife	Senior high school	3	146	53	42	3	0		Normal	Normal		3000		1.46	2.1316	24.864	19.7035
Yes	4	No	0	No			Yes	No	Housewife	Senior high school	4	148	50	42	2	0		Normal	Normal		3200		1.48	2.1904	22.8269	19.1746
No		No	0	No			Yes	No	Housewife	No school	3	152	55	42	5	0		Normal	Normal		3500		1.52	2.3104	23.8054	18.1787
No		No	0	No			Yes	No	Government employees	Diploma	3	149	61	53	2	0		Normal	Normal		3400		1.49	2.2201	27.4762	23.8728
No		No	0	Yes	>1 mo	>1x/week	Yes	No	Self-employee	Senior high school	3	149	65	56	2	0		Normal	Normal		3300		1.49	2.2201	29.278	25.2241
No		No	0	Yes	>1 mo	>1x/week	Yes	No	Private employee	Senior high school	3	147	56	45	1	0		First	Normal		3000		1.47	2.1609	25.9151	20.8247
No		No	0	No			Yes	Yes	Housewife	Senior high school	3	152	77	68	1	0		First	Normal	Epis	3200		1.52	2.3104	33.3276	29.4321
No		No	0	No			Yes	No	Self-employee	Senior high school	3	151	58	49	2	0		SC	SC		3100		1.51	2.2801	25.4375	21.4903
No		No	0	No			Yes	No	Housewife	Elementary school	3	155	70	62	3	0		Normal	Normal		3200		1.55	2.4025	29.1363	25.8065
Yes	2	Yes	7	No			Yes	No	Housewife	Junior high school	2	150	55	46	1	0		First	Normal		3100		1.5	2.25	24.4444	20.4444
No		No	0	No			Yes	No	Self-employee	Junior high school	3	155	65	56	7	0		Normal	Normal		3300		1.55	2.4025	27.0552	23.3091
No		No	0	No			Yes	No	Housewife	Senior high school	3	150	53	40	1	0		First	SC		2900		1.5	2.25	23.5556	17.7778
No		No	0	No			Yes	No	Self-employee	Senior high school	3	155	55	43	1	0		First	Normal	Epis	3100		1.55	2.4025	22.8928	17.898
No		No	0	Yes	>1 mo	>1x/week	Yes	No	Housewife	Senior high school	3	156	77	66	2	0		Normal	Normal	Epis	3300		1.56	2.4336	31.6404	27.1203
No		No	0	No			Yes	Yes	Private employee	Senior high school	1	148	50	41	1	0		First	Normal	Epis	2900		1.48	2.1904	22.8269	18.718
Yes	3	Yes	6	No			Yes	No	Housewife	Junior high school	3	145	66	55	3	0		Normal	SC		4000		1.45	2.1025	31.3912	26.1593
No		No	0	No			Yes	No	Housewife	Senior high school	1	149	76	65	4	0		Normal	Normal		3700		1.49	2.2201	34.2327	29.278
No		No	0	No			Yes	No	Government employees	Vocational school	1	158	54	43	3	0		Normal	Normal		2800		1.58	2.4964	21.6311	17.2248
No		Yes	6	No			Yes	No	Self-employee	Senior high school	1	151	53	41	1	0		First	Normal	Epis	3700		1.51	2.2801	23.2446	17.9817
No		Yes	8	No			Yes	Yes	Self-employee	Senior high school	3	149	57	48	2	0		Normal	Normal		2500		1.49	2.2201	25.6745	21.6206
No		No	0	No			No	No	Housewife	Junior high school	3	148	69	60	3	0		Normal	Normal		3200		1.48	2.1904	31.5011	27.3923
Yes	4	No	0	No			Yes	No	Housewife	Elementary school	4	157	74	63	1	0		First	Normal	Epis	2700		1.57	2.4649	30.0215	25.5588
No		No	0	No			Yes	No	Housewife	Senior high school	3	154	66	57	1	0		First	SC		3500		1.54	2.3716	27.8293	24.0344
No		No	0	No			Yes	No	Self-employee	Senior high school	3	153	70	61	4	0		Normal	Normal		3000		1.53	2.3409	29.903	26.0584
No		No	0	No			Yes	Yes	Housewife	Senior high school	3	150	49	38	1	0		First	SC		3800		1.5	2.25	21.7778	16.8889
No		No	0	No			Yes	No	Housewife	Junior high school	1	142	60	51	2	0		Normal	Normal		2800		1.42	2.0164	29.756	25.2926
No		No	0	No			Yes	No	Private employee	Senior high school	3	148	47	33	2	0		Normal	Normal		3400		1.48	2.1904	21.4573	15.0657
Yes	5	Yes	3	No			Yes	No	Housewife	Senior high school	5	150	61	52	3	0		Normal	Normal		2500		1.5	2.25	27.1111	23.1111
No		No	0	No			Yes	No	Private employee	Senior high school	1	157	64	55	5	0		Normal	Normal		3500		1.57	2.4649	25.9645	22.3133
No		No	0	No			Yes	No	Housewife	Senior high school	1	155	56	45	2	0		SC	SC		3600		1.55	2.4025	23.3091	18.7305
No		No	0	No			Yes	No	Housewife	Junior high school	1	150	76	66	2	0		SC	SC		3300		1.5	2.25	33.7778	29.3333
No		No	0	No			Yes	No	Housewife	Senior high school	1	147	61	50	2	0		Normal	Normal		3500		1.47	2.1609	28.229	23.1385
No		Yes	9	No			Yes	No	Housewife	Junior high school	1	148	57	46	1	0		First	Normal	Epis	2800		1.48	2.1904	26.0226	21.0007
No		Yes	6	No			No	No	Housewife	Elementary school	1	155	64	53	4	0		Normal	Normal		3300		1.55	2.4025	26.6389	22.0604
Yes	6	No	0	No			Yes	Yes	Private employee	Vocational school	6	155	50	41	1	0		First	Normal	Epis	2600		1.55	2.4025	20.8117	17.0656
No		No	0	No			No	No	Housewife	Elementary school	3	146	48	40	2	0		Normal	Normal		3100		1.46	2.1316	22.5183	18.7652
No		Yes	7	No			No	No	Self-employee	Senior high school	3	150	63	56	2	0		SC	SC		3100		1.5	2.25	28	24.8889
No		No	0	No			Yes	Yes	Private employee	Senior High School	1	152	62	50	2	0		Normal	normal		2900		1.52	2.3104	26.8352	21.6413
No		No	0	No			No	No	Self-employee	Senior High School	3	148	42	43	1	0		First	Normal		2700		1.48	2.1904	19.1746	19.6311
No		Yes	9	No			Yes	No	Self-employee	Senior high school	3	153	59	50	3	0		Normal	Normal		2900		1.53	2.3409	25.204	21.3593
No		Yes	6	No			Yes	Yes	Private employee	Senior High School	3	146	50	38	1	0		First	Normal		2700		1.46	2.1316	23.4566	17.827
Yes	2	No	0	No			Yes	Yes	Private employee	Senior High School	2	149	51	43	1	0		First	SC		2800		1.49	2.2201	22.9719	19.3685
Yes	3	No	0	No			Yes	Yes	Private employee	Senior High School	3	150	62	50	2	0		Normal	normal		2900		1.5	2.25	27.5556	22.2222
No		No	0	Yes	>1 mo	>1x/week	Yes	No	Housewife	Senior High School	3	148	42	43	1	0		First	SC		2700		1.48	2.1904	19.1746	19.6311
No		No	0	No			Yes	No	Self-employee	Senior high school	3	153	60	50	4	0		Normal	Normal		2900		1.53	2.3409	25.6312	21.3593
No		No	0	No			Yes	No	Housewife	Junior high school	3	155	57	48	4	1	Natural	Normal	Normal		3100		1.55	2.4025	23.7253	19.9792
No		Yes	6	No			Yes	No	Housewife	Junior high school	1	150	48	42	1	0		First	SC		3000		1.5	2.25	21.3333	18.6667
No		No	0	No			Yes	No	Self-employee	Senior high school	1	149	65	57	1	0		First	Normal	Epis	2800		1.49	2.2201	29.278	25.6745
No		No	0	Yes	<1mo	>1x/week	Yes	No	Housewife	Junior high school	1	158	79	70	1	0		First	Normal	Epis	3100		1.58	2.4964	31.6456	28.0404
No		No	0	No			Yes	No	Self-employee	Vocational school	3	153	47	40	2	0		Normal	SC		2800		1.53	2.3409	20.0777	17.0874
Yes	3	No	0	No			Yes	Yes	Housewife	Elementary school	6	145	56	47	2	0		Normal	Normal		2800		1.45	2.1025	26.635	22.3543
No		Yes	4	No			Yes	Yes	Housewife	Junior high school	3	155	45	57	2	0		SC	SC		3300		1.55	2.4025	18.7305	23.7253
No		No	0	No			Yes	Yes	Private employee	Senior High School	3	157	50	62	1	0		First	Normal	Epis	3000		1.57	2.4649	20.2848	25.1532
No		Yes	5	No			No	No	Housewife	Senior High School	3	159	78	69	3	0		Normal	Normal		3000		1.59	2.5281	30.8532	27.2932
Yes	4	No	0	No			Yes	No	Self-employee	Vocational school	5	144	79	68	5	0		Normal	Normal		2900		1.44	2.0736	38.098	32.7932
No		No	0	No			Yes	No	Self-employee	Senior high school	3	161	78	68	3	0		Normal	Normal		2500		1.61	2.5921	30.0914	26.2336
No		No	0	No			Yes	No	Housewife	Senior high school	1	160	77	64	3	0		Normal	Normal		3800		1.6	2.56	30.0781	25
No		Yes	6	No			No	No	Self-employee	Vocational school	1	157	78	65	2	0		Normal	Normal		2700		1.57	2.4649	31.6443	26.3702
No		No	0	No			Yes	No	Housewife	Elementary school	1	157	45	53	2	0		Normal	Normal		2500		1.57	2.4649	18.2563	21.5019
Yes	2	Yes	8	No			Yes	Yes	Private employee	Senior high school	2	155	46	57	2	0		Normal	Normal	Epis	3500		1.55	2.4025	19.1467	23.7253
No		Yes	5	No			Yes	No	Housewife	Junior high school	1	160	68	59	3	0		Normal	Normal		3000		1.6	2.56	26.5625	23.0469
No		No	0	No			Yes	No	Housewife	Senior High School	1	158	70	62	1	0		First	Normal	Epis	3200		1.58	2.4964	28.0404	24.8358
Yes	4	No	0	No			Yes	No	Self-employee	Diploma	4	144	46	38	3	0		Normal	Normal		2600		1.44	2.0736	22.1836	18.3256
No		No	0	No			Yes	No	Housewife	Senior high school	3	148	70	61	3	0		Normal	Normal		3200		1.48	2.1904	31.9576	27.8488
No		No	0	No			Yes	Yes	Housewife	Senior high school	1	157	76	64	1	0		First	Normal	Epis	3200		1.57	2.4649	30.8329	25.9645
No		No	0	No			Yes	No	Private employee	Junior high school	1	163	69	60	3	0		Normal	Normal		2900		1.63	2.6569	25.9701	22.5827
No		Yes	2	No			Yes	Yes	Private employee	Senior High School	1	160	62	54	1	0		First	Normal	Epis	2800		1.6	2.56	24.2187	21.0937
Yes	3	No	0	No			Yes	No	Private employee	Senior High School	3	150	75	68	2	0		Normal	Normal		2900		1.5	2.25	33.3333	30.2222
No		Yes	4	No			No	No	Housewife	Senior High School	3	153	62	53	2	0		SC	SC		2900		1.53	2.3409	26.4855	22.6409
No		No	0	No			Yes	No	Private employee	Senior high school	3	150	62	51	1	0		First	Normal	Epis	2600		1.5	2.25	27.5556	22.6667
No		Yes	6	No			Yes	No	Housewife	Junior high school	3	147	58	51	4	0		Normal	Normal		3100		1.47	2.1609	26.8407	23.6013
No		Yes	4	No			Yes	No	Private employee	Senior High School	3	147	58	52	2	0		Normal	Normal		2500		1.47	2.1609	26.8407	24.064
No		No	0	No			Yes	No	Private employee	Senior High School	3	154	57	50	2	0		Normal	Normal		3100		1.54	2.3716	24.0344	21.0828
No		Yes	4	No			Yes	No	Private employee	Senior High School	3	149	51	39	2	0		SC	SC		2900		1.49	2.2201	22.9719	17.5668
No		No	0	No			No	Yes	Private employee	Senior High School	1	155	56	43	2	0		Normal	Normal		3300		1.55	2.4025	23.3091	17.898
No		No	0	No			Yes	No	Private employee	Senior High School	1	155	50	41	1	0		First	Normal	Epis	3200		1.55	2.4025	20.8117	17.0656
No		No	0	No			Yes	No	Housewife	No school	1	158	62	53	3	0		Normal	Normal		3300		1.58	2.4964	24.8358	21.2306
No		No	0	Yes	<1mo	>1x/week	Yes	No	Private employee	Junior high school	1	150	65	56	4	1	Natural	Normal	Normal		3700		1.5	2.25	28.8889	24.8889
No		No	0	No			Yes	No	Housewife	Vocational school	1	149	58	50	2	0		Normal	Normal		3600		1.49	2.2201	26.1249	22.5215
No		Yes	8	No			Yes	Yes	Housewife	Junior high school	1	152	67	60	3	0		Normal	Normal		3700		1.52	2.3104	28.9993	25.9695
Yes	5	Yes	8	No			Yes	No	Self-employee	Senior High School	5	156	76	65	1	0		First	Normal		3600		1.56	2.4336	31.2295	26.7094
Yes	4	No	0	No			Yes	No	Private employee	Senior High School	4	160	82	74	2	0		SC	SC		4400		1.6	2.56	32.0312	28.9062
No		Yes	9	No			Yes	No	Private employee	Junior high school	1	154	67	60	3	0		Normal	Normal		3600		1.54	2.3716	28.251	25.2994
No		No	0	No			Yes	No	Housewife	Junior high school	3	150	89	80	2	0		Normal	SC		2600		1.5	2.25	39.5556	35.5556
No		No	0	No			Yes	No	Private employee	Senior High School	1	155	50	41	1	0		First	Normal	Epis	3200		1.55	2.4025	20.8117	17.0656
No		No	0	Yes	>1 mo	>1x/week	Yes	Yes	Housewife	No school	1	158	62	53	3	0		Normal	Normal		3300		1.58	2.4964	24.8358	21.2306
No		No	0	No			Yes	No	Housewife	Senior high school	1	149	65	57	1	0		First	Normal	Epis	2800		1.49	2.2201	29.278	25.6745
No		Yes	4	No			Yes	No	Private employee	Senior high school	1	164	74	65	1	0		First	Normal	Epis	2500		1.64	2.6896	27.5134	24.1672
Yes	6	Yes	9	No			No	Yes	Private employee	Junior high school	6	155	62	51	4	1	Natural	Normal	Normal		3100		1.55	2.4025	25.8065	21.2279
No		No	0	No			Yes	No	Housewife	Elementary school	3	144	46	38	3	0		Normal	Normal		2600		1.44	2.0736	22.1836	18.3256
No		Yes	4	No			Yes	No	Housewife	Senior high school	3	148	70	61	3	0		Normal	Normal		3200		1.48	2.1904	31.9576	27.8488
No		Yes	6	No			Yes	No	Self-employee	Vocational school	3	145	60	51	2	0		Normal	Normal		2900		1.45	2.1025	28.5375	24.2568
Yes	4	No	0	No			Yes	No	Housewife	Elementary school	6	165	77	63	5	1	Natural	Normal	Normal		4100		1.65	2.7225	28.2828	23.1405
No		No	0	No			Yes	No	Housewife	Elementary school	3	156	79	70	3	0		Normal	Normal		2700		1.56	2.4336	32.4622	28.764
No		Yes	6	No			Yes	No	Private employee	Senior High School	1	147	52	43	1	0		First	Normal		2500		1.47	2.1609	24.064	19.8991
No		Yes	8	No			No	No	Housewife	Senior High School	1	152	52	41	2	0		Normal	SC		3000		1.52	2.3104	22.5069	17.7458
No		No	0	No			Yes	No	Private employee	Vocational school	1	150	54	45	5	0		Normal	Normal		2800		1.5	2.25	24	20
Yes	5	Yes	6	No			Yes	Yes	Housewife	Senior High School	6	163	79	67	2	1	Natural	Normal	Normal		2500		1.63	2.6569	29.7339	25.2174
No		Yes	6	No			Yes	No	Housewife	Senior High School	3	153	60	49	1	0		First	Normal	Epis	3000		1.53	2.3409	25.6312	20.9321
No		No	0	No			Yes	Yes	Private employee	Vocational school	3	151	60	53	2	0		Normal	Normal		2900		1.51	2.2801	26.3146	23.2446
No		Yes	8	No			Yes	No	Housewife	Senior high school	3	145	57	48	3	0		Normal	Normal		3800		1.45	2.1025	27.1106	22.83
Yes	3	No	0	No			No	No	Housewife	Junior high school	3	149	57	51	2	0		Normal	Normal		2500		1.49	2.2201	25.6745	22.9719
Yes	4	Yes	5	No			No	Yes	Self-employee	Senior High School	5	150	59	48	2	0		SC	SC		3000		1.5	2.25	26.2222	21.3333
No		No	0	No			Yes	No	Housewife	Elementary school	3	156	55	48	4	0		Normal	Normal		3000		1.56	2.4336	22.6003	19.7239
No		Yes	4	No			Yes	No	Private employee	Senior High School	3	153	58	50	1	0		First	Normal	Epis	2500		1.53	2.3409	24.7768	21.3593
No		No	0	No			Yes	No	Housewife	Senior High School	3	149	49	42	1	0		First	Normal	Epis	3000		1.49	2.2201	22.0711	18.9181
No		Yes	4	No			Yes	No	Private employee	Senior High School	3	161	78	68	1	0		First	Normal	Epis	3500		1.61	2.5921	30.0914	26.2336
Yes	4	No	0	No			Yes	No	Housewife	Senior High School	4	170	81	72	5	0		Normal	Normal		3100		1.7	2.89	28.0277	24.9135
Yes	3	Yes	7	No			Yes	Yes	Private employee	Senior High School	5	154	59	50	2	0		SC	SC		3900		1.54	2.3716	24.8777	21.0828
No		No	0	No			No	No	Private employee	Senior High School	3	146	47	40	3	1	Natural	Normal	Normal		3000		1.46	2.1316	22.0492	18.7652
No		No	0	No			Yes	No	Private employee	Senior High School	3	152	59	49	3	0		Normal	Normal		3200		1.52	2.3104	25.5367	21.2084
No		Yes	7	No			No	Yes	Housewife	Elementary school	3	158	65	57	2	0		Normal	Normal		2700		1.58	2.4964	26.0375	22.8329
No		No	0	No			Yes	No	Housewife	Senior high school	3	150	67	58	1	0		First	Normal		2700		1.5	2.25	29.7778	25.7778
Yes	4	Yes	5	No			Yes	No	Private employee	Senior high school	4	157	59	49	1	0		First	Normal		2800		1.57	2.4649	23.9361	19.8791
No		Yes	4	No			Yes	No	Private employee	Senior High School	3	157	68	58	2	0		Normal	Normal		3200		1.57	2.4649	27.5873	23.5304
No		No	0	No			Yes	No	Private employee	Senior High School	3	145	60	51	3	1	Natural	Normal	Normal		2500		1.45	2.1025	28.5375	24.2568
Yes	4	No	0	No			Yes	No	Private employee	Senior High School	4	163	77	67	2	0		Normal	Normal		2800		1.63	2.6569	28.9811	25.2174
No		No	0	Yes	>1 mo	>1x/week	Yes	Yes	Housewife	No school	3	156	68	59	7	0		Normal	Normal		3200		1.56	2.4336	27.9421	24.2439
No		Yes	5	No			Yes	No	Private employee	Senior High School	3	153	59	52	3	0		Normal	Normal		2800		1.53	2.3409	25.204	22.2137
No		No	0	Yes	<1mo	>1x/week	Yes	No	Private employee	Senior high school	3	147	56	45	1	0		First	Normal		3000		1.47	2.1609	25.9151	20.8247
Yes	5	Yes	9	No			No	Yes	Private employee	Elementary school	5	155	69	62	2	0		Normal	Normal		2800		1.55	2.4025	28.7201	25.8065
No		Yes	6	No			Yes	No	Housewife	Senior high school	1	155	53	45	2	0		Normal	SC		3500		1.55	2.4025	22.0604	18.7305
Yes	3	No	0	No			Yes	No	Housewife	Junior high school	3	154	56	45	1	0		First	SC		3400		1.54	2.3716	23.6128	18.9745
No		Yes	8	No			Yes	No	Housewife	Senior High School	1	159	70	63	4	1	Natural	Normal	Normal		3300		1.59	2.5281	27.6888	24.9199
No		No	0	No			No	No	Housewife	Elementary school	1	156	70	63	3	0		Normal	Normal		2900		1.56	2.4336	28.764	25.8876
No		No	0	No			Yes	Yes	Housewife	Junior high school	4	149	62	51	3	0		Normal	Normal		2900		1.49	2.2201	27.9267	22.9719
Yes	6	Yes	9	No			No	No	Housewife	Elementary school	6	152	58	50	2	0		Normal	Normal		2600		1.52	2.3104	25.1039	21.6413
No		No	0	No			No	No	Housewife	Senior High School	4	165	76	70	2	0		Normal	Normal		3000		1.65	2.7225	27.9155	25.7117
No		No	0	No			No	No	Housewife	Junior high school	4	154	61	52	3	0		Normal	Normal		3400		1.54	2.3716	25.721	21.9261
Yes	4	Yes	6	No			Yes	No	Private employee	Junior high school	6	150	77	68	2	0		Normal	Normal		2700		1.5	2.25	34.2222	30.2222
No		Yes	3	No			Yes	Yes	Housewife	Elementary school	4	157	75	67	2	0		Normal	Normal	Epis	3500		1.57	2.4649	30.4272	27.1816
No		Yes	5	No			Yes	No	Housewife	Junior high school	4	150	68	62	3	0		Normal	Normal		3200		1.5	2.25	30.2222	27.5556
Yes	5	No	0	No			Yes	No	Self-employee	Senior High School	6	155	60	52	2	0		Normal	Normal		3500		1.55	2.4025	24.974	21.6441
Yes	6	Yes	6	No			Yes	No	Midwifery	Bachelor	6	160	68	61	1	0		First	Normal	Epis	3500		1.6	2.56	26.5625	23.8281
No		No	0	No			Yes	No	Housewife	Elementary school	4	148	57	49	5	1	Natural	Normal	Normal		3000		1.48	2.1904	26.0226	22.3703
No		Yes	7	No			Yes	No	Private employee	Senior High School	4	150	56	48	1	0		First	Normal	Epis	3200		1.5	2.25	24.8889	21.3333
No		No	0	No			Yes	Yes	Housewife	Junior high school	3	151	71	62	1	0		First	Normal	Epis	3300		1.51	2.2801	31.139	27.1918
Yes	3	No	0	No			Yes	No	Self-employee	Senior high school	3	149	50	43	2	0		Normal	Normal		2600		1.49	2.2201	22.5215	19.3685
No		Yes	5	No			Yes	No	Housewife	Senior high school	3	152	52	45	2	0		SC	SC		3200		1.52	2.3104	22.5069	19.4771
No		No	0	No			Yes	No	Housewife	Junior high school	3	152	50	50	1	0		First	Normal		3400		1.52	2.3104	21.6413	21.6413
No		No	0	No			Yes	No	Housewife	Elementary school	3	157	70	63	5	0		Normal	Normal		2900		1.57	2.4649	28.3987	25.5588
Yes	4	Yes	7	No			No	Yes	Housewife	Junior high school	4	156	73	64	2	0		Normal	Normal		3500		1.56	2.4336	29.9967	26.2985
No		Yes	6	No			Yes	No	Housewife	Senior High School	1	145	51	43	1	0		First	Normal	Epis	2600		1.45	2.1025	24.2568	20.4518
No		No	0	No			Yes	No	Private employee	Senior High School	1	150	74	65	3	0			Normal		3700		1.5	2.25	32.8889	28.8889
Yes	3	No	0	No			Yes	No	Housewife	Junior high school	4	154	67	55	4	0		Normal	Normal		2800		1.54	2.3716	28.251	23.1911
No		Yes	5	No			Yes	Yes	Private employee	Senior high school	1	143	56	47	1	0		First	Normal		3300		1.43	2.0449	27.3852	22.984
No		No	0	Yes	>1 mo	<1x/week	Yes	Yes	Self-employee	Senior High School	1	153	75	67	3	0		Normal	Normal		2500		1.53	2.3409	32.039	28.6215
Yes	4	Yes	8	No			No	No	Housewife	Senior High School	4	163	65	57	3	0		Normal	Normal		3000		1.63	2.6569	24.4646	21.4536
No		Yes	9	No			Yes	No	Housewife	Elementary school	4	156	49	42	2	0		Normal	SC		2700		1.56	2.4336	20.1348	17.2584
Yes	6	Yes	6	No			Yes	Yes	Housewife	Elementary school	6	151	69	62	4	0		Normal	Normal		2800		1.51	2.2801	30.2618	27.1918
Yes	5	No	0	No			Yes	No	Housewife	Junior high school	5	143	57	50	2	0		SC	Normal		3100		1.43	2.0449	27.8742	24.4511
No		No	0	No			Yes	No	Self-employee	Elementary school	3	154	67	60	2	0		Normal	Normal		3000		1.54	2.3716	28.251	25.2994
No		Yes	7	No			Yes	No	Housewife	Junior high school	3	145	58	49	2	0		Normal	Normal		3000		1.45	2.1025	27.5862	23.3056
No		No	0	No			Yes	No	Housewife	Elementary school	3	159	70	62	2	0		Normal	Normal		2500		1.59	2.5281	27.6888	24.5243
No		No	0	No			Yes	Yes	Private employee	Senior high school	3	154	76	69	3	0		Normal	Normal		2800		1.54	2.3716	32.0459	29.0943
